# Supplementary material for: A Comparative Analysis of Palbociclib and Ribociclib in Metastatic Hormone Receptor-Positive, HER2-Negative Breast Cancer: A Prospective mid term Follow-Up Study from an Indian Cohort
Source: Research Square preprint supplement (doi:10.21203/rs.3.rs-5658222/v1), 2025-04-28
Supplement: Supplementary file 1 [file 4202cd2cc293fd018c479c87.xlsx]

## Sheet: Sheet1
Age	Sex	Date of Diagnosis	Comorbidities	BMI	Menopausal status	Obstretic History	Family Histroy	BRCA Status	Histology	Bone disease Only	Visceral disease Only	Both	ER	PR	Hormone Receptor	Her2Neu	Ki 67%	First lineTreatment	Neutropenia	Fatigue	Anemia	Thrtombocytopenia	Deraanged LFT	ECG Changes	Second line treatment	Last Follow up: (01.12.23)
31	F	2020-04-01	None	19	Perimenopausal	P2L2	NAD	Negative	IDC	Bone disease	None	None	Positive(8/8)	Positive(5/8)	Positive	Negative	40	Ribociclib+Letrozole	Nil	Nil	Nil	Nil	Nil	Nil	Progressive disease (Feb 2023)	Alive
55	F	2020-05-01	None	20	Postmenopausal	P3L2A1	NAD	Negative	IDC	None	Lung+Brain	None	Positive(6/8)	Positive(6/8)	Positive	Negative	25	Ribociclib+Letrozole	Nil	Nil	Nil	Nil	Nil	Nil	Stable disease	Alive
65	F	2020-06-01	HCV	20	Postmenopausal	P1L1	NAD	Negative	IDC	Bone disease	None	None	Positive (6/8)	Negative	Positive	Negative	0.2	Ribociclib+Letrozole	Grade 1	Nil	Nil	Nil	Nil	Nil	Stable disease	Alive
33	F	2020-01-01	None	21	Perimenopausal	P0	NAD	Negative	IDC	None	Lung+Brain+Liver	None	Positive (8/8)	Positive (8/8)	Positive	Negative	30	Ribociclib+Letrozole	Grade 1	Nil	Nil	Grade 1	Grade 1	Nil	Taxol	Disease Progression( December 2021)-Death(14.02.22)
52	F	2020-03-01	None	22	Postmenopausal	P3L3	NAD	Negative	IDC	None	Lung+Nonregional nodes	None	Positive (7/8)	Positive(5/8)	Positive	Negative	15	Ribociclib+Letrozole	Grade 1	Nil	Grade 1	Grade 1	Nil	Nil	Stable disease	Alive
65	F	2020-05-01	None	24	Postmenopausal	P2l2	NAD	Negative	IDC	None	Lung+Nonregional nodes	None	Positive (8/8)	Positive(6/8)	Positive	Negative	40	Ribociclib+Letrozole	Grade 1	Nil	Grade 1	Grade 1	Nil	Grade 1	Stable disease	Alive
53	F	2020-09-01	None	20.2	Postmenopausal	P1L1	NAD	Negative	IDC	None	LungBrain+Liver	None	Positive (4/8)	Positive(3/8)	Positive	Negative	35	Ribociclib+Letrozole	Nil	Grade 2	Nil	Nil	Nil	Nil	Progressive disease	Dearh-MI( 20.05.23)
54	F	2020-11-01	None	19	Postmenopausal	P0	NAD	Negative	IDC	None	Lung+Brain+Liver	None	Positive (3/8)	Positive (3/8)	Positive	Negative	25	Ribociclib+Letrozole	Nil	Nil	Nil	Nil	Nil	Nil	Stable disease	Alive
48	F	2020-01-01	None	23	Perimenopausal	P3L3	NAD	Negative	IDC	None	Lung+Brain+Liver	None	Positive (4/8)	Negative	Positive	Negative	20	Ribociclib+Letrozole	Nil	Nil	Nil	Nil	Grade 1	Nil	Stable disease	Alive
54	F	2021-06-01	None	23	Postmenopausal	P2L1D1	NAD	Negative	IDC	Bone disease	None	None	Positive (8/8)	Positive (8/8)	Positive	Negative	15	Ribociclib+Letrozole	Nil	Nil	Nil	Nil	Nil	Nil	Stable disease	Alive
35	F	2021-12-01	None	24	Perimenopausal	P2L2	NAD	Negative	IDC	None	Lung+Non regional nodes	None	Positive (6/8)	Negative	Positive	Negative	25	Ribociclib+Letrozole	Grade 1	Nil	Grade 1	Nil	Nil	Nil	Stable disease	Alive
38	F	2020-01-01	None	20	Perimenopausal	P0	NAD	Negative	IDC	None	Lung+Liver	None	Positive (8/8)	Positive (7/8)	Positive	Negative	20	Ribociclib+Letrozole	Grade 2	Grade 1	Nil	Nil	Nil	Nil	Progressive disease	Death-RTA(15.06.22)
61	F	2020-11-01	None	22	Postmenopausal	P2L2	NAD	Negative	IDC	None	Lung+Liver	None	Positive (8/8)	Positive(5/8)	Positive	Negative	15-20	Ribociclib+Letrozole	Nil	Grade 1	Nil	Nil	Nil	Nil	Stable disease	Alive
65	F	2021-04-01	None	19.5	Postmenopausal	P3L2A1	NAD	Negative	IDC	None	None	Bone+Lung	Positive (8/8)	Positive (8/8)	Positive	Negative	25	Ribociclib+Letrozole	Nil	Nil	Nil	Nil	Nil	Nil	Stable disease	Alive
53	F	2020-05-01	None	22	Postmenopausal	P1L1	NAD	Negative	IDC	None	None	Bone+Lung+Brain	Positive (8/8)	Negative	Positive	Negative	30	Ribociclib+Letrozole	Nil	Nil	Nil	Nil	Nil	Nil	Stable disease	Alive
60	F	2020-01-01	None	20	Postmenopausal	P0	NAD	Negative	IDC	None	Lung+Brain	None	Positive (6/8)	Positive (5/8)	Positive	Negative	25	Ribociclib+Letrozole	Nil	Nil	Nil	Nil	Nil	Nil	Stable disease	Alive
34	F	2020-07-01	None	20	Perimenopausal	P3L3	NAD	Negative	IDC	None	None	Bone+Liver+lung	Positive (3/8)	Positive (3/8)	Positive	Negative	40	Ribociclib+Letrozole	Nil	Nil	Nil	Nil	Grade 2	Nil	Progressive disease	Death (23.07.23)
58	F	2021-11-01	None	19	Postmenopausal	P2l2	NAD	Negative	IDC	None	Lung+Brain	None	Positive (4/8)	Negative	Positive	Negative	25	Ribociclib+Letrozole	Nil	Grade 1	Nil	Nil	Nil	Nil	Stable disease	Alive
80	F	2020-03-01	HTN,CAD	20	Postmenopausal	P1L1	NAD	Negative	IDC	Bone disease	None	None	Positive (8/8)	Positive (8/8)	Positive	Negative	30	Ribociclib+Letrozole	Grade 3	Grade 1	Nil	Nil	Nil	Nil	Stable disease	Alive
41	F	2021-02-01	None	20	Perimenopausal	P0	NAD	Negative	IDC	None	Lung+Brain	None	Positive (5/8)	Negative	Positive	Negative	15	Ribociclib+Letrozole	Nil	Nil	Nil	Nil	Nil	Nil	Progressive disease	Dearh-MI( 20.08.23)
59	F	2020-06-01	None	21	Postmenopausal	P3L3	NAD	Negative	IDC	None	Lung+Nonregional nodes	None	Positive (8/8)	Positive (7/8)	Positive	Negative	40	Ribociclib+Letrozole	Nil	Nil	Nil	Nil	Nil	Nil	Progressive disease	Alive
62	F	2020-12-01	None	22	Postmenopausal	P2L1D1	NAD	Negative	IDC	None	Lung+Brain+Liver	None	Positive (8/8)	Positive(5/8)	Positive	Negative	35	Ribociclib+Letrozole	Nil	Nil	Nil	Nil	Nil	Nil	Stable disease	Alive
32	F	2021-08-01	None	24	Perimenopausal	P2L2	NAD	Negative	IDC	None	Lung+Brain+Liver	None	Positive (8/8)	Positive (8/8)	Positive	Negative	25	Ribociclib+Letrozole	Nil	Nil	Nil	Nil	Nil	Nil	Progressive disease	Dearh-MI( 20.01.23)
73	F	2021-02-01	None	20.2	Postmenopausal	P0	NAD	Negative	IDC	None	Brain+Liver	None	Positive (6/8)	Positiuve (6/8)	Positive	Negative	20	Ribociclib+Letrozole	Grade 3-Dose modified 400 mg	Grade 1	Nil	Nil	Nil	Nil	Progressive disease	Dearh-MI( 28.09.22)
52	F	2021-03-01	None	19	Postmenopausal	P2L2	NAD	Negative	IDC	None	Lung+Nonregional nodes	None	Positive (6/8)	Positive (5/8)	Positive	Negative	15	Ribociclib+Letrozole	Nil	Grade 1	Nil	Nil	Nil	Nil	Progressive disease	Dearh-MI( 2.04.23)
35	F	2020-01-01	None	23	Perimenopausal	P3L2A1	NAD	Negative	IDC	None	Lung+Nonregional nodes	None	Positive (3/8)	Positive (3/8)	Positive	Negative	25	Ribociclib+Letrozole	Nil	Grade 1	Nil	Nil	Nil	Nil	Stable disease	Alive
50	F	2020-10-01	None	23	Postmenopausal	P1L1	NAD	Negative	IDC	None	Lung+Nonregional nodes	None	Positive (4/8)	Negative	Positive	Negative	20	Ribociclib+Letrozole	Nil	Nil	Nil	Nil	Nil	Nil	Progressive disease (March 2023)	Alive
63	F	2021-11-01	HTN	24	Postmenopausal	P0	NAD	Negative	IDC	None	Lung+Nonregional nodes	None	Positive (8/8)	Positive (8/8)	Positive	Negative	15	Ribociclib+Letrozole	Nil	Nil	Nil	Nil	Nil	Nil	Progressive disease (June 2023)	Alive
62	F	2020-12-01	None	20	Postmenopausal	P3L3	NAD	Negative	IDC	None	Lung+Liver	None	Positive (6/8)	Negative	Positive	Negative	25	Ribociclib+Letrozole	Nil	Nil	Nil	Nil	Nil	Nil	Stable disease	Alive
63	F	2020-01-01	None	22	Postmenopausal	P2l2	NAD	Negative	IDC	None	Lung+Liver	None	Positive (8/8)	Positive (7/8)	Positive	Negative	30	Ribociclib+Letrozole	Grade 1	Nil	Nil	Nil	Nil	Nil	Stable disease	Alive
66	F	2021-08-01	None	19.5	Postmenopausal	P1L1	NAD	Negative	IDC	None	Lung+Liver	None	Positive (8/8)	Positive(5/8)	Positive	Negative	25	Letrozole+Palbocoiclib	Nil	Nil	Nil	Nil	Nil	Nil	Stable disease	Alive
68	F	2021-10-01	None	22	Postmenopausal	P0	NAD	Negative	IDC	None	Lung+Liver	None	Positive (8/8)	Positive (7/8)	Positive	Negative	40	Letrozole+Palbocoiclib	Nil	Nil	Nil	Nil	Nil	Nil	Stable disease	Alive
32	F	2020-12-01	None	20	Perimenopausal	P3L3	NAD	Negative	IDC	None	Lung+Brain	None	Positive(4/8)	Positive(2/8)	Positive	Negative	30	Letrozole+Palbocoiclib	Nil	Nil	Nil	Nil	Nil	Nil	Taxol (April 2022)	Dearh-Progressive disease( 12.04.23)
58	F	2021-02-01	None	20	Postmenopausal	P2L1D1	NAD	Negative	IDC	None	None	Bone+Lung	Positive (8/8)	Positive (7/8)	Positive	Negative	25	Letrozole+Palbocoiclib	Grade 1	Nil	Nil	Nil	Nil	Nil	Stable disease	Alive
38	F	2020-04-01	None	22	Perimenopausal	P2L2	NAD	Negative	IDC	None	Lung+Non regional nodes	None	Positive (6/8)	Negative	Positive	Negative	40	Letrozole+Palbocoiclib	Grade 1	Nil	Nil	Nil	Nil	Nil	Taxol (April 2022)	Death-MI(15.05.22)
59	F	2021-03-01	None	19	Postmenopausal	P0	NAD	Negative	IDC	None	Lung+Non regional nodes	None	Positive (8/8)	Positive (7/8)	Positive	Negative	25	Letrozole+Palbocoiclib	Grade 1	Nil	Grade 1	Nil	Grade 1	Nil	Taxol (April 2023)	Death-Progressive disease(25.05.23)
60	F	2021-06-01	None	20	Postmenopausal	P2L2	NAD	Negative	IDC	None	None	Bone+Lung	Positive (8/8)	Positive(5/8)	Positive	Negative	30	Letrozole+Palbocoiclib	Grade 1	Nil	Nil	Nil	Nil	Nil	Progressive disease	Death-MI(5.05.23)
50	F	2021-11-01	None	24	Postmenopausal	P3L3	NAD	Negative	IDC	None	None	Bone+Lung+Liver	Positive (8/8)	Positive (8/8)	Positive	Negative	25	Letrozole+Palbocoiclib	Nil	Nil	Grade 1	Grade 1	Nil	Nil	Progressive disease	Death-MI(15.08.22)
48	F	2020-12-01	None	20.2	Perimenopausal	P2l2	NAD	Negative	IDC	None	None	Bone+Lung+Liver	Positive (8/8)	Positive(5/8)	Positive	Negative	20	Letrozole+Palbocoiclib	Nil	Nil	Nil	Grade 1	Nil	Nil	Stable disease	Alive
52	F	2021-03-01	None	19	Postmenopausal	P1L1	NAD	Negative	IDC	None	None	Bone+Lung+Liver	Positive (7/8)	Positive(7/8)	Positive	Negative	15	Letrozole+Palbocoiclib	Nil	Nil	Grade 1	Nil	Nil	Nil	Stable disease	Alive
51	F	2021-02-01	HTN	24	Postmenopausal	P1L1	NAD	Negative	IDC	None	None	Bone+Lung+Liver	Positive (6/8)	Positive (5/8)	Positive	Negative	30	Letrozole+Palbocoiclib	Nil	Nil	Grade 2	Nil	Nil	Nil	Taxol (April 2023)	Death-Progressive disease(5.08.23)
50	F	2021-07-01	None	20	Postmenopausal	P0	NAD	Negative	IDC	None	None	Bone+Lung+Liver	Positive (3/8)	Positive (3/8)	Positive	Negative	25	Letrozole+Palbocoiclib	Grade 2	Nil	Grade 2	Nil	Grade 1	Nil	Stable disease	Alive
58	F	2020-03-01	None	22	Postmenopausal	P3L3	NAD	Negative	IDC	None	None	Bone+Lung+Liver	Positive (5/8)	Negative	Positive	Negative	40	Letrozole+Palbocoiclib	Grade 1	Nil	Nil	Grade 1	Nil	Nil	Stable disease	Alive
57	F	2020-05-01	None	19.5	Postmenopausal	P2l2	NAD	Negative	IDC	None	None	Bone+Lung+Liver	Positive (8/8)	Positive (8/8)	Positive	Negative	25	Letrozole+Palbocoiclib	Grade 2	Grade 1	Nil	Nil	Nil	Nil	Stable disease	Alive
59	F	2021-12-01	None	22	Postmenopausal	P1L1	NAD	Negative	IDC	None	None	Bone+Lung+Liver	Positive (6/8)	Negative	Positive	Negative	30	Letrozole+Palbocoiclib	Grade 2	Grade 1	Nil	Nil	Grade 1	Nil	Stable disease	Alive
62	F	2022-01-01	None	20	Postmenopausal	P0	NAD	Negative	IDC	None	None	Bone+Lung+Liver	Positive (8/8)	Positive (7/8)	Positive	Negative	15	Letrozole+Palbocoiclib	Nil	Nil	Grade 2	Nil	Nil	Nil	Stable disease	Alive
59	F	2021-10-01	None	20	Postmenopausal	P0	NAD	Negative	IDC	None	None	Bone+Liver	Positive (6/8)	Positive (5/8)	Positive	Negative	20	Letrozole+Palbocoiclib	Grade 3-Dose modified 100 mg	Grade 1	Nil	Nil	Nil	Nil	Stable disease	Alive
58	F	2021-11-01	None	21	Postmenopausal	P2L2	NAD	Negative	IDC	None	None	Bone+Liver	Positive (8/8)	Positive (7/8)	Positive	Negative	15	Letrozole+Palbocoiclib	Nil	Grade 1	Nil	Nil	Nil	Nil	Stable disease	Alive
55	F	2021-12-01	None	22	Postmenopausal	P3L2A1	NAD	Negative	IDC	None	None	Bone+Liver	Positive (8/8)	Positive(5/8)	Positive	Negative	25	Letrozole+Palbocoiclib	Nil	Grade 1	Nil	Nil	Nil	Nil	Taxol(January 2023)	Death-Progressive disease(25.05.23)
61	F	2021-08-01	None	20	Postmenopausal	P3L3	NAD	Negative	IDC	None	None	Bone+Lung	Positive (8/8)	Positive(5/8)	Positive	Negative	40	Letrozole+Palbocoiclib	Nil	Nil	Nil	Nil	Nil	Nil	Stable disease	Alive
64	F	2021-02-01	None	19	Postmenopausal	P2L1D1	NAD	Negative	IDC	None	Lung+Liver	None	Positive (8/8)	Positive (8/8)	Positive	Negative	35	Letrozole+Palbocoiclib	Nil	Nil	Nil	Grade 1	Nil	Nil	Stable disease	Alive
59	F	2020-02-01	None	20.2	Postmenopausal	P2L2	NAD	Negative	IDC	None	None	Bone+Lung+Brain	Positive (8/8)	Positive (7/8)	Positive	Negative	20	Letrozole+Palbocoiclib	Nil	Nil	Nil	Nil	Nil	Nil	Stable disease	Alive
83	F	2020-06-01	None	20	Postmenopausal	P1L1	NAD	Negative	IDC	None	None	Bone+Lung+Brain	Positive (3/8)	Positive (3/8)	Positive	Negative	15	Letrozole+Palbocoiclib	Grade 3-Dose modified 100 mg	Nil	Grade 2	Nil	Nil	Nil	Taxol (June 2022)	MI-Death(10.08.22)
40	F	2020-04-01	None	21	Perimenopausal	P2L2	NAD	BRCA-2,VUS-Exon 18	IDC	None	None	Bone+Lung+Brain	Positive (8/8)	Positive (8/8)	Positive	Negative	10	Letrozole+Palbocoiclib	Grade 3-Dose modified 100 mg	Nil	Grade 2	Nil	Nil	Nil	Stable disease	Alive
40	F	2020-11-01	None	20	Postmenopausal	P2L2	NAD	Negative	IDC	None	None	Bone+Brain+Lung	Positive (8/8)	Negative	Positive	Negative	25	Letrozole+Palbocoiclib	Nil	Nil	Nil	Nil	Nil	Nil	Taxol(December 2022)	Death-Progressive disease(25.05.23)
45	F	2020-03-01	None	21	Postmenopausal	P2L2	NAD	Negative	IDC	None	None	Bone+Non regional nodes	Positive (8/8)	Positive (7/8)	Positive	Negative	20	Letrozole+Palbocoiclib	Nil	Nil	Nil	Nil	Nil	Nil	Taxol(December 2022)	Death-Progressive disease(2.06.23)
73	F	2021-07-01	None	20	Postmenopausal	P3L2A1	NAD	Negative	IDC	None	None	Bone+Non regional nodes	Positive (6/8)	Positive (5/8)	Positive	Negative	20	Letrozole+Palbocoiclib	Nil	Nil	Nil	Nil	Nil	Nil	Stable disease	Alive
56	F	2021-05-01	None	19	Postmenopausal	P3L2A1	NAD	Negative	IDC	None	None	Bone+Non regional nodes	Positive (8/8)	Positive (7/8)	Positive	Negative	25	Letrozole+Palbocoiclib	Nil	Nil	Nil	Nil	Nil	Nil	Progressive disease (March 2023)	Alive
40	F	2022-01-01	None	20	Postmenopausal	P1L1	NAD	Negative	IDC	None	Lung+Brain	None	Positive (8/8)	Positive(5/8)	Positive	Negative	30	Letrozole+Palbocoiclib	Grade 3-Dose modified 100 mg	Nil	Nil	Nil	Nil	Nil	Progressive disease (November 2022)	Alive
65	F	2021-12-01	HTN	21	Postmenopausal	P2L2	NAD	Negative	IDC	None	None	Bone+Lung	Positive (8/8)	Positive (8/8)	Positive	Negative	25	Letrozole+Palbocoiclib	Grade 3-Dose modified 100 mg	Nil	Grade 1	Grade 1	Nil	Nil	Progressive disease	Death-Progressive disease(20.03.23)
